# Supplementary material for: 1H NMR metabolomic profiling of resistant and susceptible oil palm root tissues in response to Ganoderma boninense at the nursery stage
Source: Springer Nature journal article supplement (doi:10.1038/s41598-025-01691-y), 2025-05-14
Supplement: MOESM1 [file 41598_2025_1691_MOESM1_ESM.pdf]

### Supplementary Figure 3

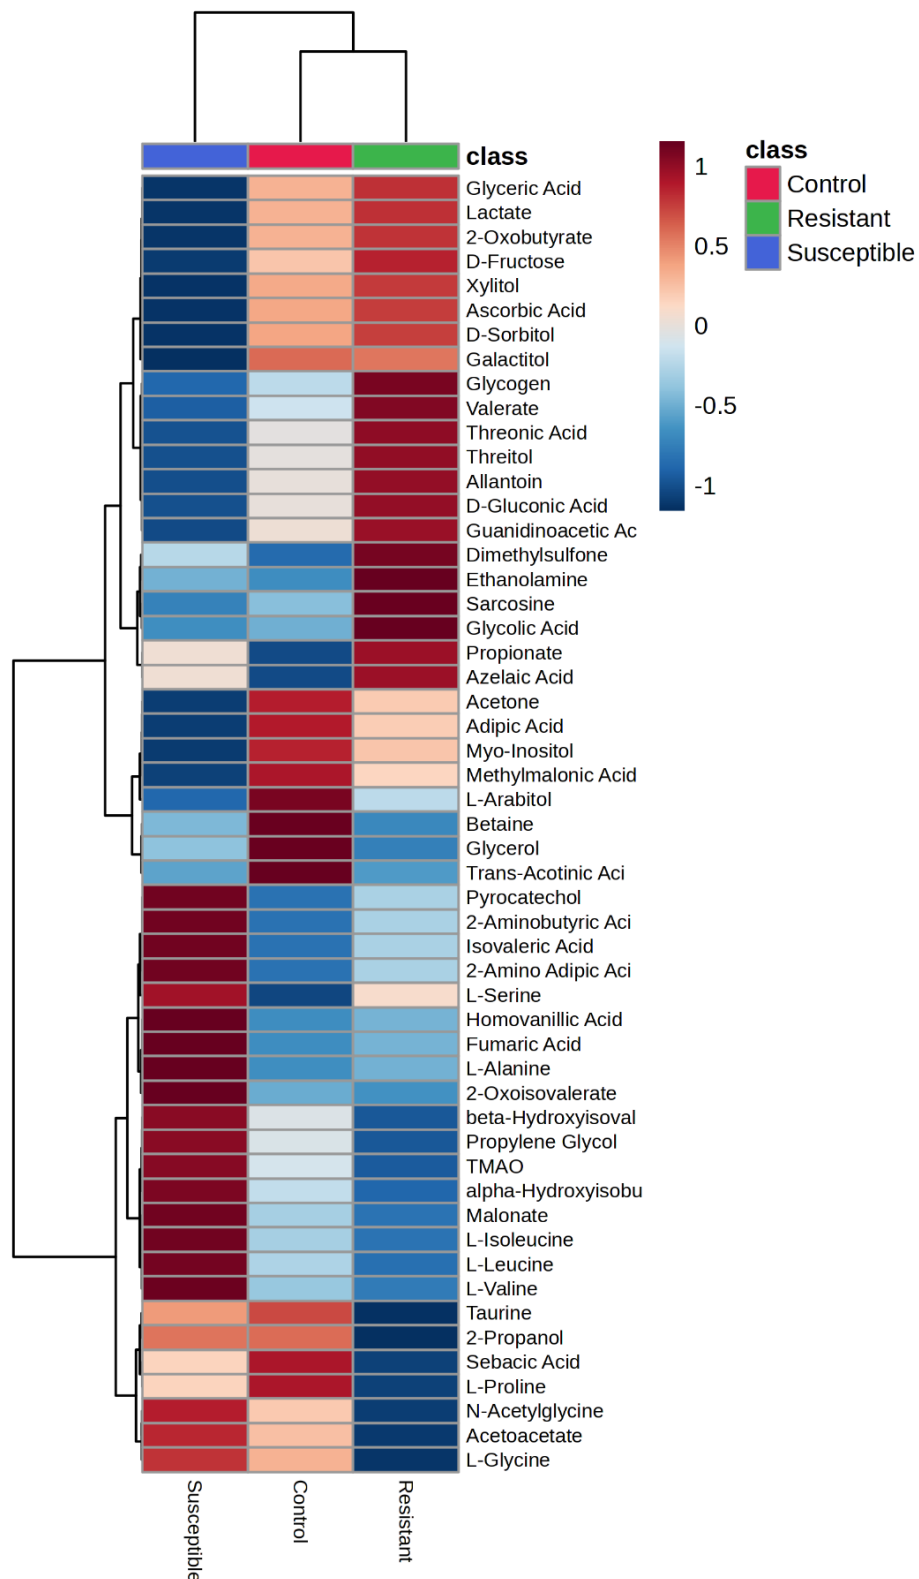

**Supplementary Figure 3.** Heatmap visualization of top 25 metabolites in resistant, susceptible, and control root tissues from oil palm seedlings. Upregulated metabolites were represented in red, while downregulated metabolites were shown in blue.
